# Supplementary material for: Relation of the pdxB-usg-truA-dedA Operon and the truA Gene to the Intracellular Survival of Salmonella enterica Serovar Typhimurium
Source: PubMed Central journal article supplement (PMC6358828; doi:10.3390/ijms20020380), 2019-01-17
Supplement: ijms-20-00380-s001.pdf [file ijms-20-00380-s001.pdf]

**Table S1.** Primers used in this study.

| <b>Name</b>                                                      | <b>Sequence (Restriction Enzyme Used) (5'-3')</b> | <b>Locus (Gene)</b>                 |
|------------------------------------------------------------------|---------------------------------------------------|-------------------------------------|
| <b>Primers used for construction of the gene mutants</b>         |                                                   |                                     |
| wu3574                                                           | TTAACGGCTGACATGGGAATTAGC                          | <i>cat</i> <sup>r</sup>             |
| wu3575                                                           | AGCGATTGTGTAGGCTGGAG                              |                                     |
| wu4015                                                           | GCGAACAGACCGCTGGAA                                | <i>pdxB</i> upstream                |
| wu4016                                                           | CACAATCGCTGTCTTCTTAATGCTCCCTGT                    |                                     |
| wu4017                                                           | CAGCCGTTAACGACTGTCGTACCTGTTTGA                    | <i>pdxB</i> downstream              |
| wu4018                                                           | GCGTGATTTTGCTGCGCT                                |                                     |
| wu4019                                                           | TCCAGATAACTACGGCGGA                               | <i>truA</i> upstream                |
| wu4020                                                           | CACAATCGCTATCCGAATCGCACACCCG                      |                                     |
| wu4021                                                           | CAGCCGTTAAGGACATCAGTACAGATACTC                    | <i>truA</i> downstream              |
| wu4022                                                           | GCGCCAGGAACGTCGTAT                                |                                     |
| wu4023                                                           | TTGGCTCCAGCTCGCTAC                                | <i>dedA</i> upstream                |
| wu4024                                                           | CACAATCGCTAACTCAGCGGTTTCGACCA                     |                                     |
| wu4025                                                           | CAGCCGTTAATGTCTTTGCCTTTCTACCCG                    | <i>dedA</i> downstream              |
| wu4026                                                           | TTACCTCGTTTCGCGCAGT                               |                                     |
| <b>Primers used for construction of the complement strains</b>   |                                                   |                                     |
| wu3957                                                           | CTTCAGACATGACTGTCGTACCTGTTTG                      | promoter                            |
| wu3967                                                           | CGAAGCTTTCGCAGCGGAAAGAGGA                         |                                     |
| wu3961                                                           | CGGGATCCGACCAGGCCGGTTTCACA                        | <i>truA</i>                         |
| wu3964                                                           | ATGTCCGGACAGCAATCATCGGC                           |                                     |
| wu4027                                                           | CGGGATCCTGGCGTTCAGCCAGTGTT                        | <i>pdxB</i>                         |
| wu4028                                                           | CGAAGCTTATTACGCCCTTCGCCTGG                        |                                     |
| <b>Primers used for detect the expression of genes by RT-PCR</b> |                                                   |                                     |
| wu4029                                                           | GCAACGCGAAGAACCTTACC                              | 16S rRNA                            |
| wu4030                                                           | TTCACAACACGAGCTGACGA                              |                                     |
| wu4031                                                           | CATTCACGGCGCTCAAGATA                              | <i>pdxB</i>                         |
| wu4032                                                           | ACTGGCGCATTTGGTGTATG                              |                                     |
| wu4033                                                           | CCGCAATCACGTTACGGTTA                              | <i>usg</i>                          |
| wu4034                                                           | TGCAGGTTGCTGGTGATAG                               |                                     |
| wu4035                                                           | CGGCGCAGAACACGTTAATA                              | <i>truA</i>                         |
| wu4036                                                           | TGAGTACGACGGCAGCAAGT                              |                                     |
| wu4037                                                           | TGCCGGACAATCTCAATGAC                              | <i>dedA</i>                         |
| wu4038                                                           | CGCCGGTTATTTCTTCGGTA                              |                                     |
| <b>Primers used for co-transcription detection in the operon</b> |                                                   |                                     |
| wu4107                                                           | GACCGACTTGCCACCAAAC                               | Between <i>pdxB</i> and <i>usg</i>  |
| wu4108                                                           | ACTGCGTAAAGTCGCTGGAA                              |                                     |
| wu4109                                                           | GTGAACGCCGGCATCGGTA                               | Between <i>usg</i> and <i>truA</i>  |
| wu4110                                                           | CCGGCAATCCACAGCTCT                                |                                     |
| wu4111                                                           | ACAAACAGCAGCGAGTCG                                | Between <i>truA</i> and <i>dedA</i> |
| wu4112                                                           | AGTAGGCGCTCACAACCA                                |                                     |
